# Supplementary material
Source: Springer Nature journal article supplement (https://www.springermedizin.de/resource/supplementary/12913_2013_2958_MOESM3_ESM.pdf/9531978)
Supplement: MOESM3 [file 9531978]

Mean Frequency of Service Use

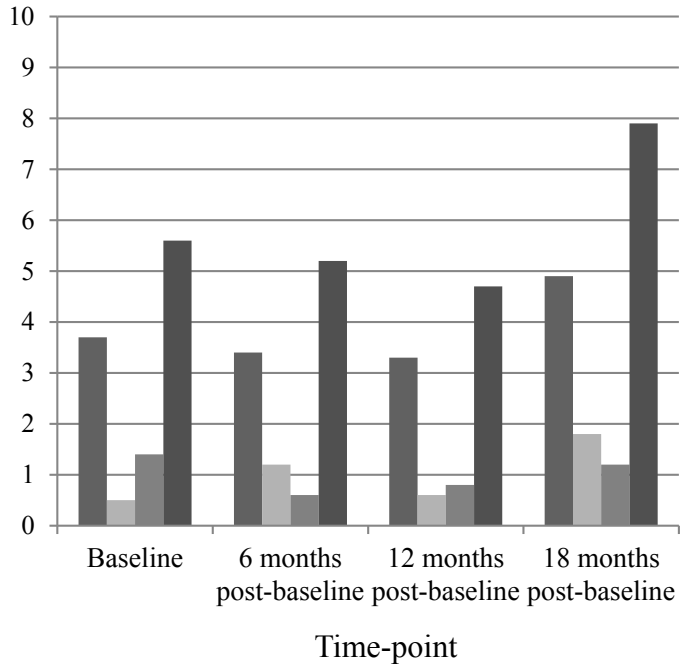

■ Primary Services  
■ Hospital Services  
■ Social Services  
■ Total Services

Mean Frequency of Service Use

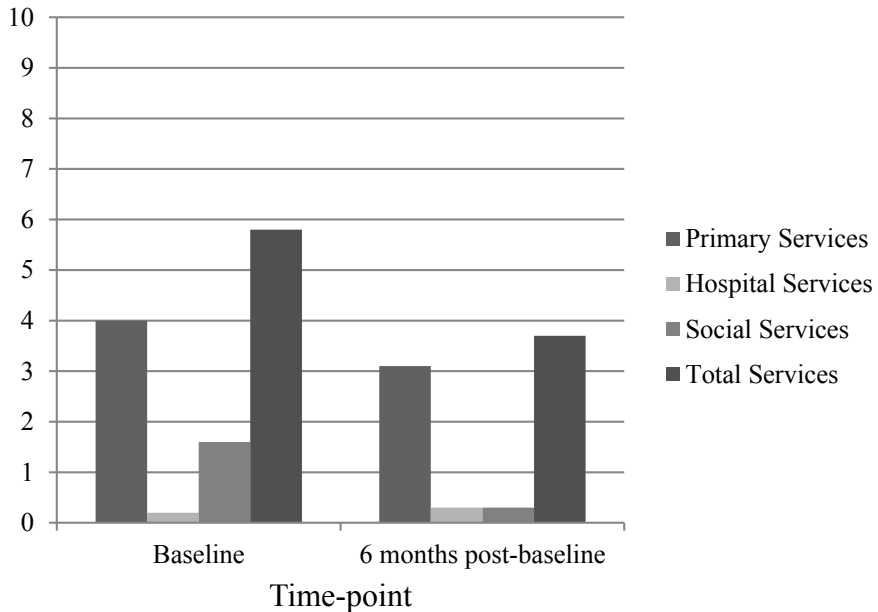

■ Primary Services  
■ Hospital Services  
■ Social Services  
■ Total Services
